# Supplementary material for: Solvent dependent ESIPT-based probe for optical recognition of Zr(iv) and Zn(ii)
Source: Royal Society of Chemistry journal article supplement (doi:10.1039/d3nj01738a), 2023-01-01

## Electronic Supporting Information (ESI)

### Solvent dependent ESIPT based probe for optical recognition of Zr(IV) and Zn(II)

Tandrim Shyam<sup>a</sup>, Subhasis Ghosh,<sup>a</sup> Sangita Maji<sup>a</sup>, Prosenjit Mandal<sup>a</sup> and Debasis Das<sup>\*a</sup>

<sup>a</sup>Department of Chemistry, The University of Burdwan, Burdwan, West Bengal, India

#### 1. EXPERIMENTAL

##### Materials

All the experimental procedures have been performed under aerobic condition. High-purity PBS, 2, 6-diformyl-4-methyl phenol (DFP) and 1-ethynylcyclohexylamine were purchased from SigmaAldrich (India). ZrO(NO<sub>3</sub>)<sub>2</sub> and Zn(OAc)<sub>2</sub> were purchased from Merck (India). The solvents used were of spectroscopic grade. Other chemicals were of analytical reagent grade and used without further purification. Mili-Q Milipore 18.2 MΩcm<sup>-1</sup>water was used whenever required.

##### Physical measurements

Physical measurements have been carried out using the following instruments. A Shimadzu Multi Spec 2450 spectrophotometer was used for recording UV-Vis. spectra. FTIR spectra were recorded on a Shimadzu FTIR (model IR Prestige 21 CE) spectrophotometer. High resolution mass spectra are recorded using Xevo G2S/Q-Toff. micro<sup>TM</sup> spectrometer. <sup>1</sup>HNMR spectra are recorded in DMSO-d<sub>6</sub> and CDCl<sub>3</sub> using Bruker Advance 400 (400 MHz) instrument. The steady state emission and excitation spectra were recorded with a Hitachi F-7100 spectrofluorimeter. A Systronics digital pH meter (model 335) was used for pH measurement. Single crystal X-ray diffraction data were collected on a Bruker X8 APEX-II CCD diffractometer at 100(2) K using graphite-monochromated Mo-Kα radiation (0.71073Å) at 150K. Data were processed and corrected for Lorentz and polarization absorption effects. Crystal structures were solved by standard direct methods using SHELXS43 and refined by full-matrix leastsquares with SHELXL44 and OLEX2 soft ware.

##### Spectroscopic and crystallographic characterization

###### A. 2, 6-Bis-[(1-ethynyl-cyclohexylimino)-methyl]-4-methyl-phenol (DEC)

DEC has molecular formula C<sub>25</sub>H<sub>30</sub>N<sub>2</sub>O (MW, 374.52). Anal. found (%): C, 80.14; H, 8.06 and N, 7.47; Calcd. (%), C, 80.17; H, 8.07 and N, 7.48. ESI-MS (*m/z*): [M-H]<sup>+</sup>, 373.21[Figure S1a]. FTIR (KBr, cm<sup>-1</sup>): 3284, ν(C–H, stretch, alkyne); 3214, ν(O–H, stretch); 2933, ν(C–H, sp<sup>2</sup>); 1627, ν(C=N, stretch); 1598, ν(C=C, stretch); 1450, ν(C–H, bending), 1349, ν(C–O, stretch); and 1252, ν(C–N, aromatic). [Figure S1b] <sup>1</sup>H NMR (CDCl<sub>3</sub>, 500 MHz, *J*, Hz, δ ppm, reference peak

7.26 ppm) [Fig. S1c and S1d]: 10.914 (1H, s); 8.872 (2H, s); 7.739 (2H,s); 2.746 (3H, s), 2.382 (2H, s) and 1.238-2.234 (10H, m). [Figure S1c] The structure is also confirmed by SC-XRD analysis.

### Single crystal X-ray diffraction analysis of DEC

DEC is characterized by spectroscopic techniques and its stereo-chemical structure is confirmed by single crystal X-ray diffraction analysis. The molecular view and atom labeling scheme and packing patterns are shown in Figure S1d. The crystallographic data and refinement parameters are presented in Table S1 while selected bond length and angles are listed in Table S2.

DEC has triclinic space group P -1 (CCDC1979508): a, 9.602(7) (Å); b, 9.726(8) (Å), c, 13.486(12) (Å);  $\alpha$  (°), 68.55(3);  $\beta$  (°), 73.114(19) (3);  $\gamma$  (°), 68.923(18); volume (Å<sup>3</sup>), 1075.4(16); Z = 2 (Table S1). DEC exists in enol form in solid state. The bond lengths N003 C19, 1.2650(17) (Å); and N002 C11, 1.2563(16)(Å) indicate the C-N double bond character while N003 C23, 1.4799(15)(Å) and N002 C5, 1.4724(18)(Å) indicate the C-N single bond character. On the other hand, O001 C18, 1.3434(16)(Å) shows single bonded character of C-O in phenol moiety. The structure is also stabilized by intra-molecular H-bonding. The bond angles C19 N003 C23, 121.31(11) (°) and C11 N002 C5, 121.59(10)(°) indicate the sp<sup>2</sup> nature of N003 and N002 centers.

### B. DEC-Zr(IV) adduct (Ad1)

Molecular formula: C<sub>50</sub>H<sub>58</sub>N<sub>6</sub>O<sub>8</sub>Zr. Anal. found (%): C, 62.38; H, 6.07 and N, 6.49. calcd. (%), C, 62.41; H, 6.08 and N, 6.53 O. ESI-MS (*m/z*): [Ad1+H]<sup>+</sup>, 962.27 [Figure S2a]. FTIR (KBr, cm<sup>-1</sup>): 3294,  $\nu$ (C–H, str., alkyne); 3078,  $\nu$ (C–H, str., sp<sup>2</sup>); 3037,  $\nu$ (C–H, str., sp<sup>2</sup>); 2928,  $\nu$ (C–H, str., sp<sup>3</sup>); 2887,  $\nu$ (C–H, str., sp<sup>3</sup>); 1688,  $\nu$ (C=N, stretch); 1600,  $\nu$ (C=C, stretch); 1478,  $\nu$ (C–H, bend.); 1280,  $\nu$ (C–N, str.) and 1192,  $\nu$ (C–O, str.) [Figure S3a].

### C. DEC-Zn(II) adduct (Ad2)

Molecular formula: C<sub>27</sub>H<sub>32</sub>N<sub>2</sub>O<sub>3</sub>Zn. Anal. found (%): C, 65.09; H, 6.88; N, 5.33 and O, 8.65; calcd. (%), C, 65.13; H, 6.90 and N, 5.33. ESI-MS (*m/z*): [Ad2+H]<sup>+</sup>, 498.16 [Figure S2b]. FTIR (KBr, cm<sup>-1</sup>): 3288,  $\nu$ (C–H, str., alkyne); 3076,  $\nu$ (C–H, str., sp<sup>2</sup>); 2883,  $\nu$ (C–H, str., sp<sup>3</sup>); 2794,  $\nu$ (C–H, str., sp<sup>3</sup>); 1687,  $\nu$ (C=N, stretch); 1586,  $\nu$ (C=C, stretch); 1507,  $\nu$ (C–H, bend.); 1434,  $\nu$ (C–H, bend.); 1203,  $\nu$ (C–N, str.) and 1171,  $\nu$ (C–O, stretch) [Figure S3b].

### General method of UV-Vis. and fluorescence titration

For absorption and emission spectroscopic data, cells having 1 cm path length were used. Stock solutions of DEC, Zr(NO<sub>3</sub>)<sub>4</sub> and Zn(NO<sub>3</sub>)<sub>2</sub> were prepared both in EtOH-water (1:4, v/v) and DMSO-water (1:5, v/v). Their working solutions were prepared from respective stock solutions *via* appropriate dilution. Fluorescence measurements were performed using 5 nm × 5 nm slit

width, where the excitation wavelengths in EtOH-water and DMSO-water were 380 nm and 350 nm respectively. All spectra were recorded at room temperature.

### **Job's plot from fluorescence experiment**

The sets of solutions containing **DEC** and analyte [Zr(IV) and Zn(II)] are so prepared that the total concentration of **DEC** and analyte remain constant (5  $\mu$ M) in all the sets. The mole fraction (X) of analyte is varied from 0.1 to 0.9 for all sets. The emission intensities at 508 nm for Zr(IV) ( $\lambda_{\text{ex}} = 370$  nm) and 475 nm for Zn(II) ( $\lambda_{\text{ex}} = 350$  nm) are plotted as a function of mole fraction of Zr(IV) and Zn(II) respectively. **DEC** forms 2:1 (mole ratio) adduct with Zr(IV) and 1:1 (mole ratio) adduct with Zn(II). This is also confirmed from their respective mass spectra.

### **Determination of binding constant**

The binding constants between **DEC** and two analyte, Zr(IV) and Zn(II) are determined employing modified Benesi-Hildebrand equation<sup>1</sup>:  $(F_{\text{max}} - F_0) / (F_x - F_0) = 1 + (1/K) (1/[C]^n)$  where,  $F_{\text{max}}$ ,  $F_0$  and  $F_x$  are emission intensities for **DEC** in presence of analyte at saturation, in absence of analyte and at any intermediate analyte concentrations respectively. The plots of  $(F_{\text{max}} - F_0) / (F_x - F_0)$  vs.  $[C]^{-1}$  (here,  $n = 1.0$ ) generate the binding constants from the slope while  $[C]$  is molar concentration of analyte.

### **Determination of detection limit**

The detection limit (**DL**) is estimated using the following equation<sup>2</sup>:

$$DL = \frac{3\sigma}{S}$$

$\sigma$  is the standard deviation of the blank solution,  $S$  is the slope of the calibration curve.

For determination of standard deviation, the emission intensity of **DEC** without any analyte was measured 10 times.<sup>3</sup>

### **Time correlated single photon counting (TCSPC) experiment**

Fluorescence lifetime data of all compounds were measured with a Horiba Delta Flex<sup>tm</sup> time correlated single photon counting (TCSPC) instrument. A laser operating  $\gamma_{\text{max}} = 403$  nm with a repetition rate of 1 MHz is used as the excitation source. The width of the instrument function, which was limited by the FWHM of the excitation source, was 110ps. The lamp profile was recorded by placing a scatterer in place of the sample. The signal was collected at the magic angle of 54.7°. The decay were deconvoluted using DAS-6 decay analysis software and acceptability of fits was judged by  $\chi^2$  criteria.

The relative contributions ( $\alpha_n$ ) to the fluorescence decay of the multi exponential decay were obtained using the following relation<sup>7</sup>.

$$\alpha_n = \frac{B_n}{\sum_{i=1}^n B_i}$$

$B_i$  is the pre-exponential factor of a single exponential decay. The average lifetime of the compound was calculated using the following relation:

$$\langle \tau \rangle = \frac{\sum_{i=1}^n \alpha_i t_i^2}{\sum_{i=1}^n \alpha_i t_i}$$

### Determination of quantum yield

The fluorescence quantum yields are determined using naphthalene as reference having  $\phi_R$ , 0.2 in MeOH<sup>4</sup>. The sample and the reference dye are excited at same wavelength ( $\lambda_{ex}$ , 380 nm for EtOH-water and  $\lambda_{ex}$ , 350 nm for DMSO-water media), maintaining nearly equal absorbance (0.1) and emission intensities. The area of the emission spectra are measured and the quantum yields are calculated following the equation<sup>5</sup>,  $\phi_S / \phi_R = [A_S/A_R] \times [(Abs)_R/(Abs)_S] \times [\eta_S^2/\eta_R^2]$ , where  $\phi_S$  and  $\phi_R$  are fluorescence quantum yields of the sample and reference respectively,  $A_S$  and  $A_R$  are area under the fluorescence spectra of the sample and the reference respectively,  $(Abs)_S$  and  $(Abs)_R$  are the corresponding optical densities of the sample and the reference solution at the wavelength of excitation;  $\eta_S$  and  $\eta_R$  are the refractive indices of the sample and reference, respectively<sup>6</sup>.

The quantum yields of free **DEC** and [**DEC-Zr(IV)**]adduct (**Ad1**) in PBS buffer media (10 mM, pH 7.4) are 0.017 and 0.1432 respectively in EtOH-water media. On the other hand, the quantum yields of free **DEC** and [**DEC-Zn(II)**] adduct (**Ad2**) in PBS buffer media (10 mM, pH 7.4) are 0.0186 and 0.1512 respectively in DMSO-water media.

**Table S1** Crystallographic data table for **DEC**

| Molecule          | DEC                                              |
|-------------------|--------------------------------------------------|
| CCDC              | 1979508                                          |
| Empirical formula | C <sub>25</sub> H <sub>30</sub> N <sub>2</sub> O |
| Formula weight    | 374.51                                           |
| Crystal system    | Triclinic                                        |
| Space group       | P -1                                             |

|                                        |            |
|----------------------------------------|------------|
| Temperature                            | 296K       |
| Wavelength                             | 0.71073    |
| a/Å                                    | 9.602(7)   |
| b/Å                                    | 9.726(8)   |
| c/Å                                    | 13.486(12) |
| $\alpha/^\circ$                        | 68.55(3)   |
| $\beta/^\circ$                         | 73.114(19) |
| $\gamma/^\circ$                        | 68.923(18) |
| Volume/Å <sup>3</sup>                  | 1075.4(16) |
| Z                                      | 2          |
| $\rho_{\text{calc}}$ g/cm <sup>3</sup> | 1.157      |

**Table S2** Selected bond lengths [Å] and angles [°] for **DEC**

| ATOMS    | BOND LENGTH | ATOMS        | BOND ANGLE |
|----------|-------------|--------------|------------|
| O001 C18 | 1.3434(16)  | C11 N002 C5  | 121.59(10) |
| N002 C11 | 1.2563(16)  | C19 N003 C23 | 121.31(11) |
| N002 C5  | 1.4724(18)  | O001 C18 C12 | 119.43(11) |
| N003 C19 | 1.2650(17)  | O001 C18 C17 | 120.93(10) |
| N003 C23 | 1.4799(15)  | C12 C18 C17  | 119.63(11) |
| C18 C12  | 1.3973(16)  | N002 C5 C3   | 113.78(10) |
| C18 C17  | 1.4045(19)  | N002 C5 C6   | 107.09(9)  |
| C5 C3    | 1.4691(19)  | C3 C5 C6     | 109.80(12) |
| C5 C6    | 1.531(2)    | N002 C5 C10  | 106.71(11) |
| C5 C10   | 1.536(2)    | C3 C5 C10    | 109.79(11) |
| C12 C13  | 1.3834(18)  | C6 C5 C10    | 109.55(10) |
| C12 C11  | 1.4683(19)  | C18 C12 C13  | 118.87(11) |
| C13 C15  | 1.3840(19)  | C18 C12 C11  | 120.69(11) |
| C17 C16  | 1.3883(19)  | C13 C12 C11  | 120.44(10) |
| C17 C19  | 1.4530(17)  | C15 C13 C12  | 122.96(10) |
| C15 C16  | 1.3862(18)  | N002 C11 C12 | 120.91(11) |
| C15 C14  | 1.497(2)    | C16 C17 C18  | 118.99(10) |
| C23 C20  | 1.469(2)    | C16 C17 C19  | 120.03(11) |
| C23 C29  | 1.532(2)    | C18 C17 C19  | 120.94(11) |
| C23 C28  | 1.522(2)    | C16 C15 C13  | 117.07(11) |
| C6 C7    | 1.523(2)    | C16 C15 C14  | 121.99(12) |
| C3 C4    | 1.1675(19)  | C13 C15 C14  | 120.93(11) |
| C10 C9   | 1.517(2)    | C20 C23 N003 | 111.74(11) |
| C28 C22  | 1.521(2)    | C20 C23 C29  | 110.35(11) |
| C29 C26  | 1.5272(19)  | N003 C23 C29 | 108.19(11) |
| C20 C21  | 1.173(2)    | C20 C23 C28  | 109.80(12) |
| C7 C8    | 1.513(2)    | N003 C23 C28 | 107.30(10) |
| C26 C27  | 1.507(3)    | C29 C23 C28  | 109.37(12) |
| C22 C27  | 1.510(3)    | N003 C19 C17 | 122.12(12) |
| C9 C8    | 1.504(2)    | C7 C6 C5     | 112.52(10) |
|          |             | C4 C3 C5     | 179.58(16) |

|  |  |             |            |
|--|--|-------------|------------|
|  |  | C15 C16 C17 | 122.37(12) |
|  |  | C9 C10 C5   | 112.25(11) |
|  |  | C22 C28 C23 | 112.08(11) |
|  |  | C23 C29 C26 | 111.31(12) |
|  |  | C21 C20 C23 | 177.95(17) |
|  |  | C27 C26 C29 | 110.59(12) |
|  |  | C27 C22 C28 | 111.56(13) |
|  |  | C8 C9 C10   | 111.09(12) |
|  |  | C22 C27 C26 | 111.53(13) |
|  |  | C9 C8 C7    | 110.77(12) |

**Table S3 Results from TD-DFT calculations on DEC**

| <b>Compound</b> | <b>Electronic Transitions</b>      | <b>Energy<sup>a</sup> (eV)</b> | <b>Wavelength (nm)</b> | <b>f<sup>b</sup></b> | <b>Transitions involved</b>                          |
|-----------------|------------------------------------|--------------------------------|------------------------|----------------------|------------------------------------------------------|
| <b>DEC</b>      | <b>S<sub>0</sub>→S<sub>1</sub></b> | <b>3.6827 eV</b>               | <b>336.66 nm</b>       | <b>f=0.1589</b>      | <b>HOMO→LUMO</b>                                     |
|                 | <b>S<sub>0</sub>→S<sub>2</sub></b> | <b>4.3617 eV</b>               | <b>284.25 nm</b>       | <b>f=0.0013</b>      | <b>HOMO-1→LUMO<br/>HOMO-2→LUMO<br/>HOMO-2→LUMO+1</b> |
|                 | <b>S<sub>0</sub>→S<sub>3</sub></b> | <b>4.6318 eV</b>               | <b>267.68 nm</b>       | <b>f=0.0241</b>      | <b>HOMO-1→LUMO<br/>HOMO-1→LUMO+1<br/>HOMO→LUMO+1</b> |
| <b>Ad1</b>      | <b>S<sub>0</sub>→S<sub>1</sub></b> | <b>1.5866 eV</b>               | <b>781.47 nm</b>       | <b>f=0.0049</b>      | <b>HOMO-1→LUMO<br/>HOMO-1→LUMO+2</b>                 |
|                 | <b>S<sub>0</sub>→S<sub>2</sub></b> | <b>1.7158 eV</b>               | <b>722.62 nm</b>       | <b>f=0.0049</b>      | <b>HOMO→LUMO<br/>HOMO-2→LUMO</b>                     |
|                 | <b>S<sub>0</sub>→S<sub>3</sub></b> | <b>1.7657 eV</b>               | <b>702.19 nm</b>       | <b>f=0.0101</b>      | <b>HOMO→LUMO<br/>HOMO-2→LUMO</b>                     |
| <b>Ad2</b>      | <b>S<sub>0</sub>→S<sub>1</sub></b> | <b>2.4704 eV</b>               | <b>501.89 nm</b>       | <b>f=0.0010</b>      | <b>HOMO→LUMO<br/>HOMO-1→LUMO</b>                     |
|                 | <b>S<sub>0</sub>→S<sub>2</sub></b> | <b>3.1461 eV</b>               | <b>394.08 nm</b>       | <b>f=0.0831</b>      | <b>HOMO→LUMO<br/>HOMO-1→LUMO</b>                     |
|                 | <b>S<sub>0</sub>→S<sub>3</sub></b> | <b>3.3317 eV</b>               | <b>372.14 nm</b>       | <b>f=0.0090</b>      | <b>HOMO→LUMO+1<br/>HOMO-1→LUMO+1</b>                 |

## Comparison of sensing parameters of DEC with reported probes

Efficiency of **DEC** is compared with that of reported probes (**Table S4**). It is noteworthy that fluorescence sensors of Zr(IV) is very rare. The **DEC** detects Zr(IV) with good detection limit through turn on fluorescence as well as Zn(II) with good LOD. Easy synthesis, quick response and reasonable LOD make DEC useful for practical application.

**Table S4** Comparison of **DEC** with reported literature

| Sl. No. | System (probe)                                                                      | Type                                   | Limit of detection (LOD)                              | Ref. |
|---------|-------------------------------------------------------------------------------------|----------------------------------------|-------------------------------------------------------|------|
| 1       | 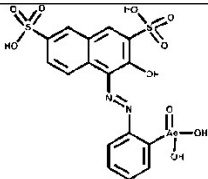   | PVC membrane-based electrode sensor    | $6.0 \times 10^{-7} \text{ mol L}^{-1}$ [for Zr(IV)]  | 8    |
| 2       | 2-(Bis-(pyridin-2-ylmethyl)amino)ethan-1-ol and GO hybrid (GOP)                     | Turn-on fluorescence sensor            | $27 \text{ ng mL}^{-1}$ [for Zr(IV)]                  | 9    |
| 3       | 4-Chloro-N-(2,6-dimethylphenyl)-2-hydroxy-5-sulfamoylbenzamide (xipamide, XM)       | Potentiometric sensor                  | $1.0 \times 10^{-6} \text{ mol L}^{-1}$ [for Zr(IV)]  | 10   |
| 4       | Gold cysteamine self-assembled monolayer by nitrilotriacetic acid                   | Electrochemical impedance spectroscopy | $7.8 \times 10^{-10} \text{ M}$ [for Zr(IV)]          | 11   |
| 5       |  | Turn-on fluorescence sensor            | $8.48 \times 10^{-8} \text{ mol L}^{-1}$ [for Zn(II)] | 12   |
| 6       |  | Turn-on fluorescence sensor            | $0.832 \text{ nM}$ [for Zn(II)]                       | 13   |
| 7       |  | Turn-on fluorescence sensor            | $1.4 \times 10^{-7} \text{ M}$ [for Zn(II)]           | 14   |

|    |                                                                                     |                |              |                                                                                                                      |                |
|----|-------------------------------------------------------------------------------------|----------------|--------------|----------------------------------------------------------------------------------------------------------------------|----------------|
| 8  | 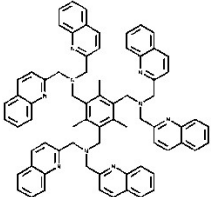   | Turn-on sensor | fluorescence | $35.60 \times 10^{-9}$ M and<br>$29.45 \times 10^{-8}$ M<br>[for Zn(II)]                                             | 15             |
| 9  |    | Turn-on sensor | fluorescence | $5.5 \times 10^{-5}$ mol L <sup>-1</sup><br>[for Zn(II)]<br>$2.7 \times 10^{-5}$ mol L <sup>-1</sup><br>[For Cu(II)] | 16             |
| 10 |    | Turn-on sensor | fluorescence | [for Zn(II)]                                                                                                         | 17             |
| 11 |    | Turn-on sensor | fluorescence | $1.44 \times 10^{-7}$ M<br>[For Zn(II)]                                                                              | 18             |
| 12 |   | Turn-on sensor | fluorescence | 49 nM<br>[for Al(III)]<br>35 nM<br>[For Zn(II)]                                                                      | 19             |
| 13 |  | Turn-on sensor | fluorescence | 19.43 nM<br>[for Zr(IV)] and<br>23.46 nM<br>for Zn(II)]                                                              | Present report |

## Reference

1. H. A. Benesi and J. H. Hildebrand, *J. Am. Chem. Soc.*, 1949, **71**, 2703-2707
2. M. Zhu, M. Yuan, X. Liu, J. Xu, J. Lv, C. Huang, H. Liu, Y. Li, S. Wang and D. Zhu, *Org. Lett.*, 2008, **10**, 1481-1484
3. S. Dey, R. Purkait, K. Pal, K. Jana and C. Sinha, *ACS Omega*, 2019, **4**, 8451-8464
4. W. H. Melhuish, *J. Phys. Chem.*, 1961, **65**, 229-235
5. E. Austin and M. Gouterman, *Bioinorg. Chem.*, 1978, **9**, 281-298
6. F. I. El-Dossoki, *J. Chin. Chem. Soc.*, 2007, **54**, 1129-1137
7. S. Khanra, S. Ta, M. Ghosh, S. Chatterjee, P. Mukherjee and D. Das, *New J. Chem.*, 2020, **44**, 8477-8485
8. H. A. Arida, *Talanta*, 2008, **76**, 40-43
9. J. B. Asha and P. Suresh, *ACS Sustainable Chemistry & Engineering*, 2020, **8(38)**, 14301-14311
10. G. G. Mohameda, H. A. Mohameda and E. Y. Frag, *Microchemical Journal*, 2020, **157**, 105063
11. R. K. Shervedan and M. Bagherzadeh, *Sensors and Actuators B*, 2009, **139**, 657-664



12. X. Wu, Z. Zhang, H. Liu and S. Pu, *RSC Adv.*, 2020, **10**, 15547-15553
13. S. Dey, A. Roy, G. P. Maiti, S. K. Mandal, P. Banerjee and P. Roy, *New J. Chem.*, 2016, **40**, 1365-1376
14. L. Gu, X. Wan, H. Liu, T. Liu and Y. Yao, *Anal. Methods*, 2014, **6**, 8460-8463
15. S. Sinha, B. Chowdhury, N. N. Adarsh and P. Ghosh, *Dalton Trans.*, 2018, **47**, 6819-6830
16. S. Xia, G. Liu and S. Pu, *J. Mater. Chem. C*, 2015, **3**, 4023-4029
17. Z. Liu, C. Zhang, Y. Li, Z. Wu, F. Qian, X. Yang, W. He, X. Gao and Z. Guo, *Org. Lett.*, 2009, **11**, 795-798
18. W. K. Dong, S. F. Akogun, Y. Zhang, Y. X. Sun and X. Y. Dong, *Sensors and Actuators B*, 2017, **238**, 723-734
19. T. Shyam, M. Ghosh, S. Ghosh, and D. Das, *Chemistry Select*, 2023, **8**, e202204534

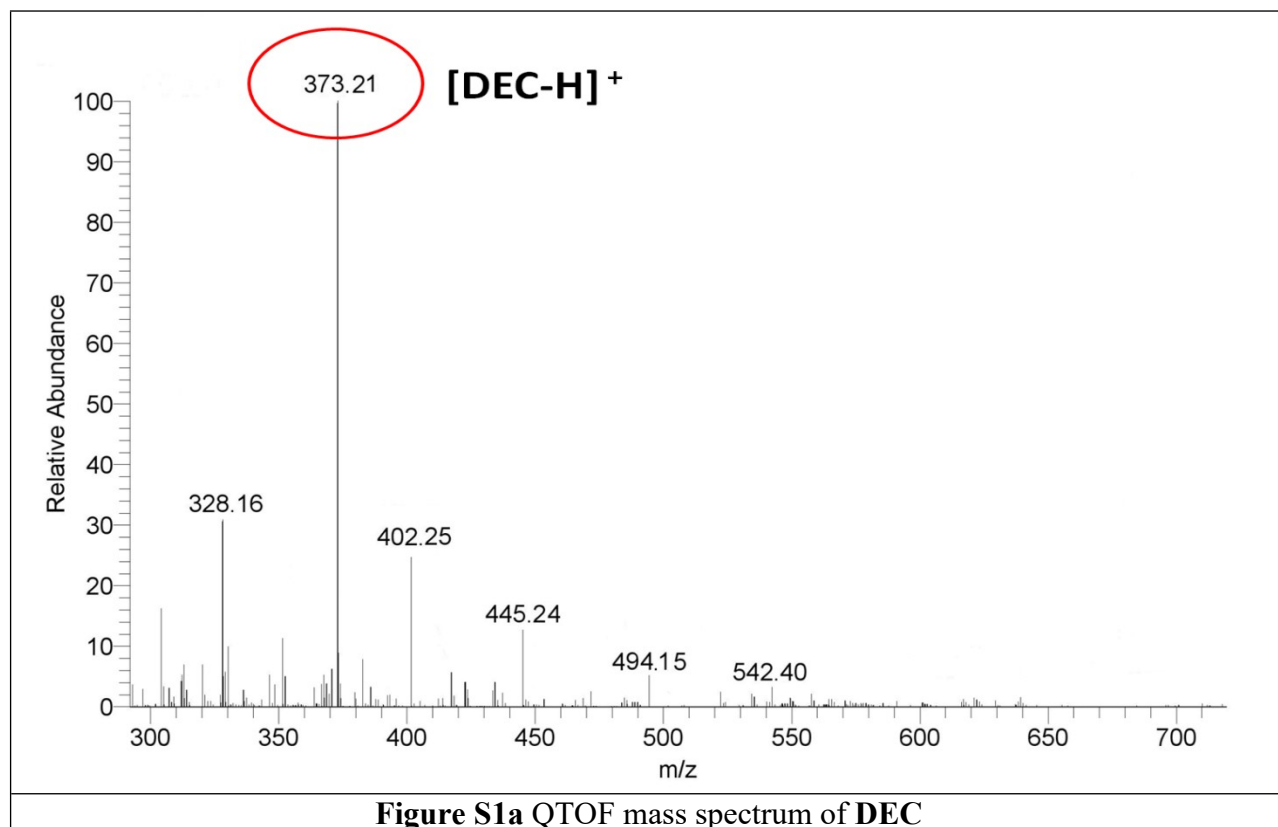

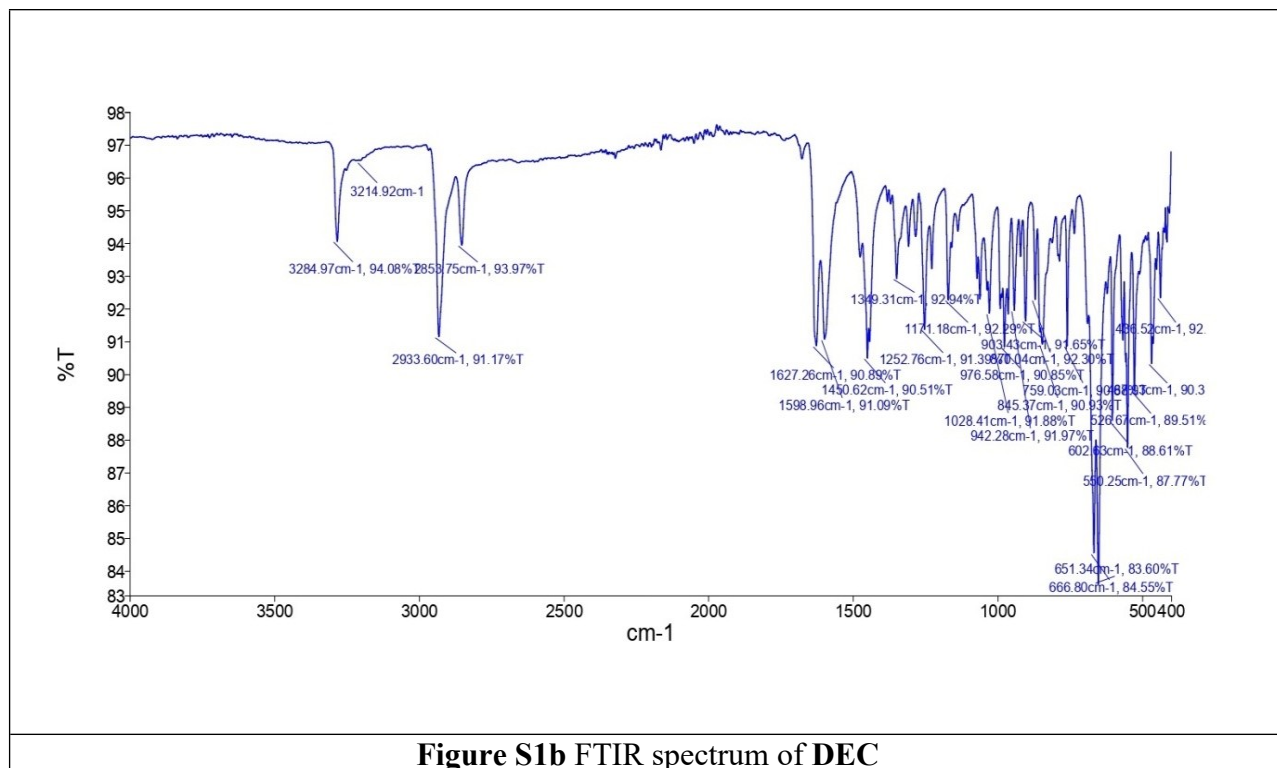

Figure S1b FTIR spectrum of DEC

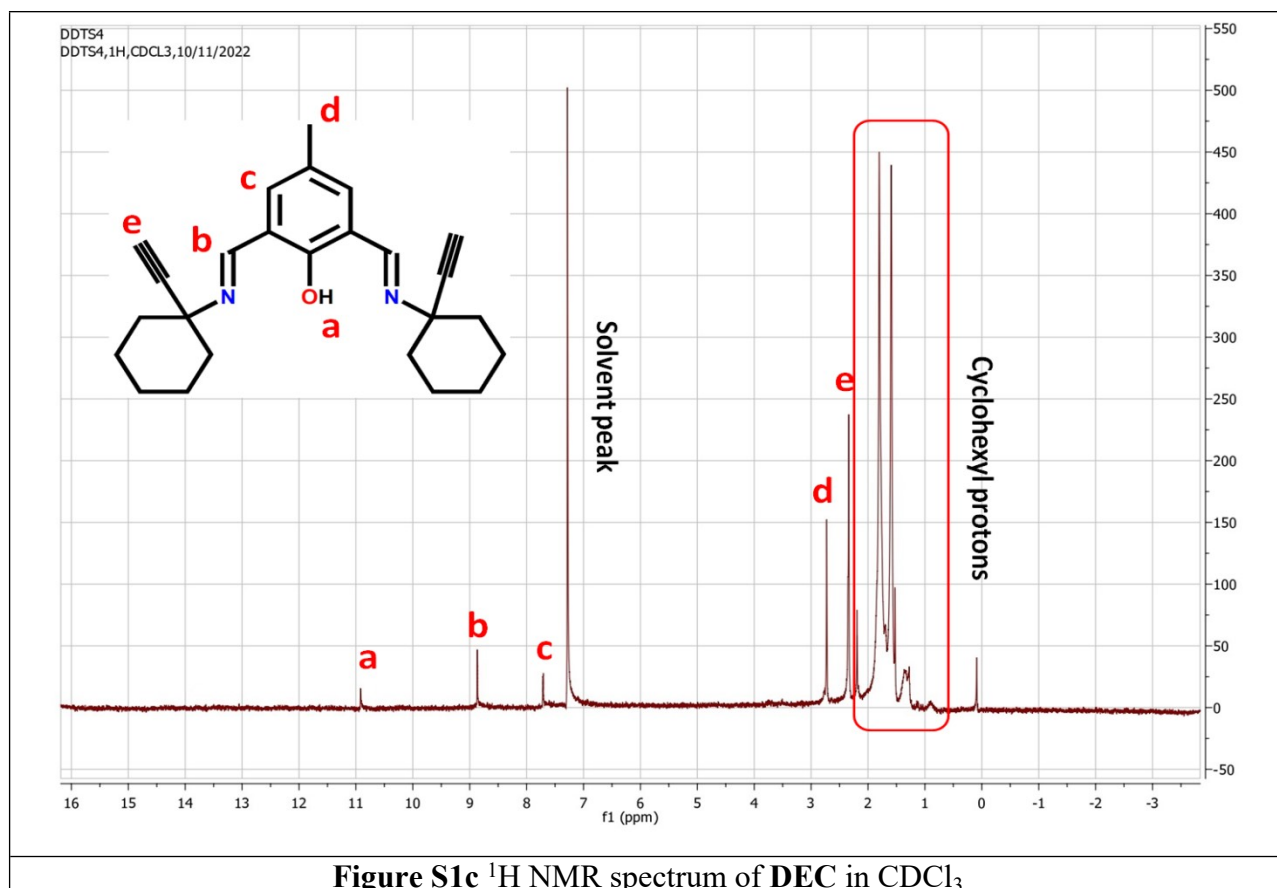

Figure S1c <sup>1</sup>H NMR spectrum of DEC in CDCl<sub>3</sub>

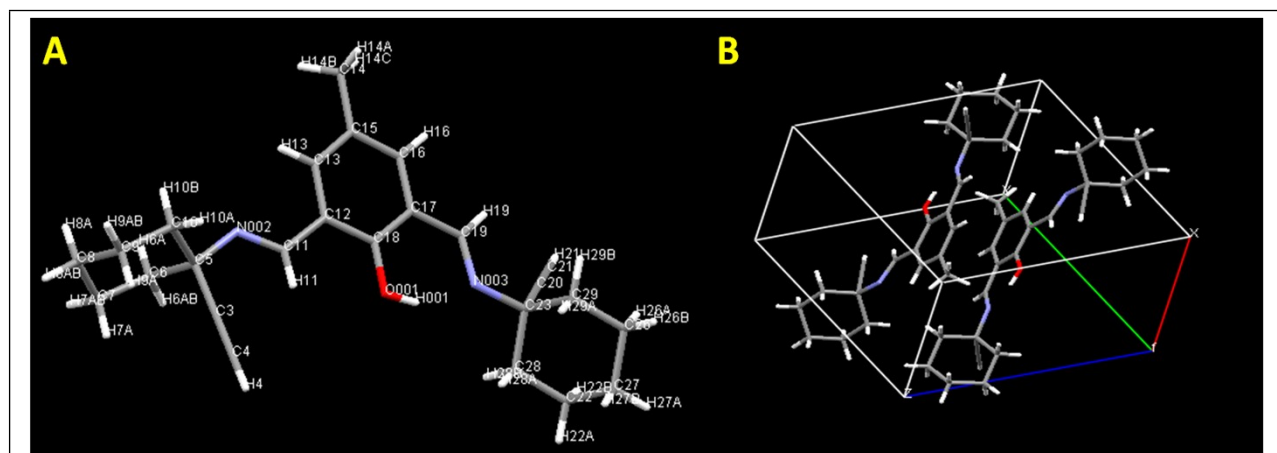

**Figure S1d** Single crystal X-ray structure of DEC with (A) atom labelling scheme and (B) packing diagram.

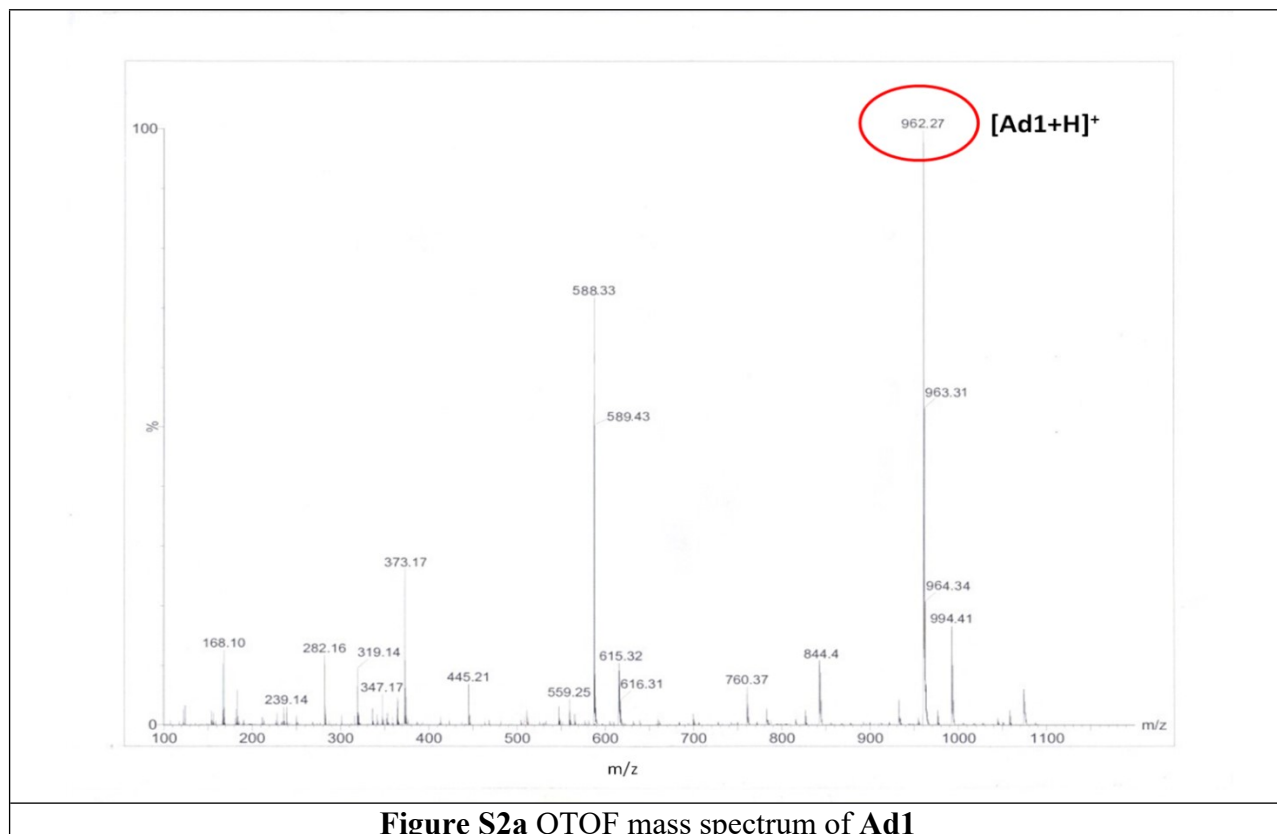

**Figure S2a** QTOF mass spectrum of Ad1

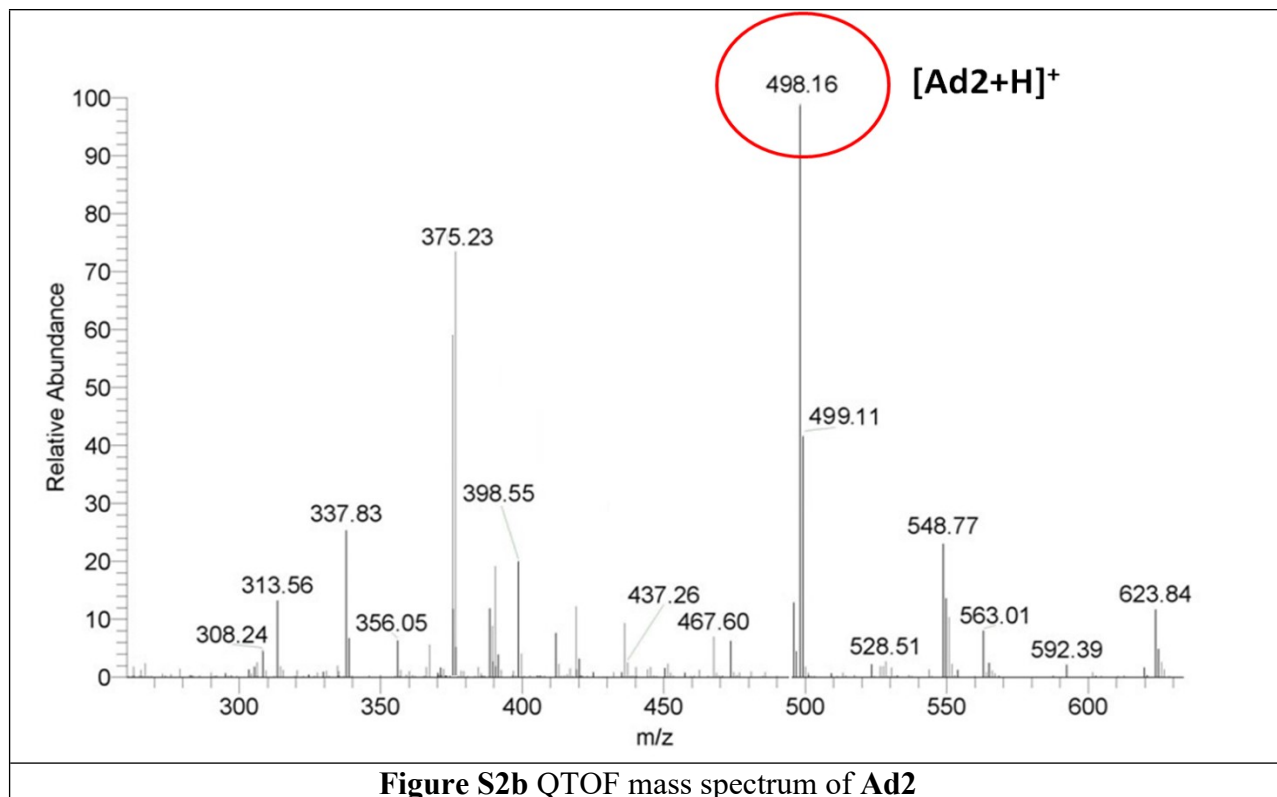

Figure S2b QTOF mass spectrum of Ad2

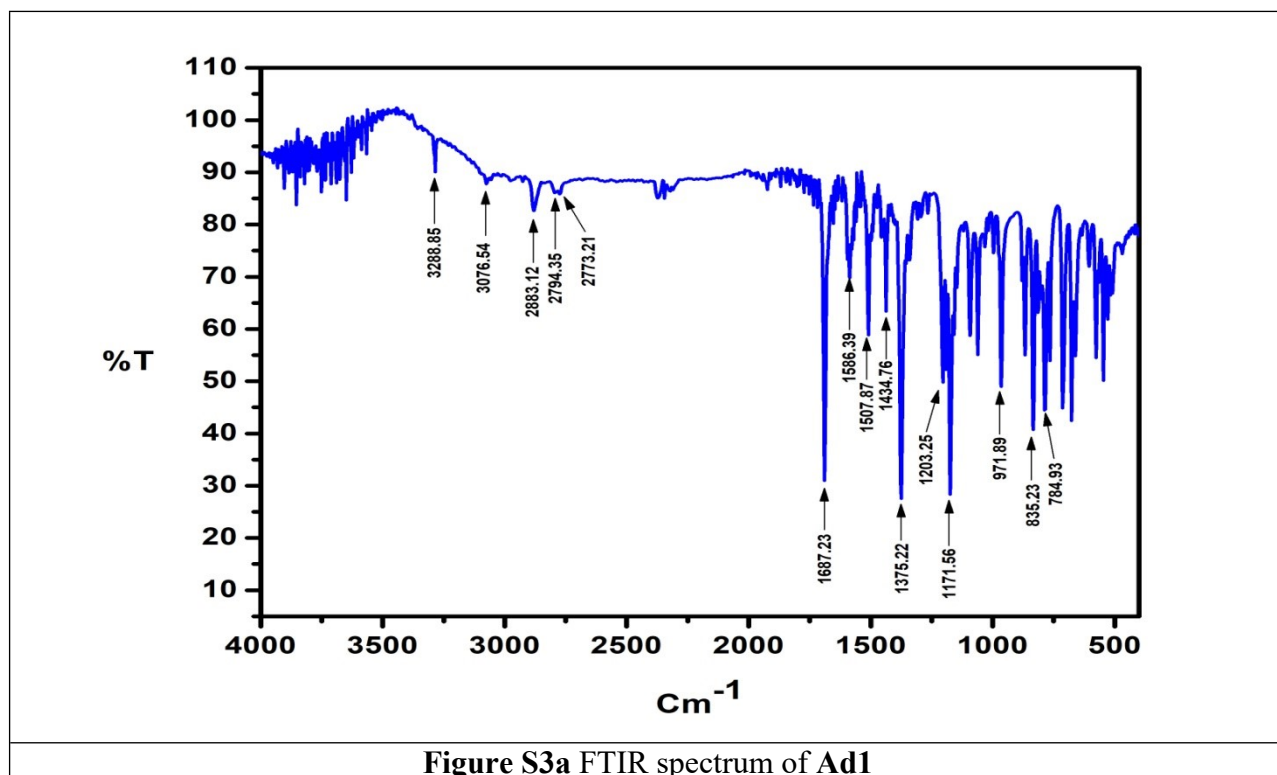

Figure S3a FTIR spectrum of Ad1

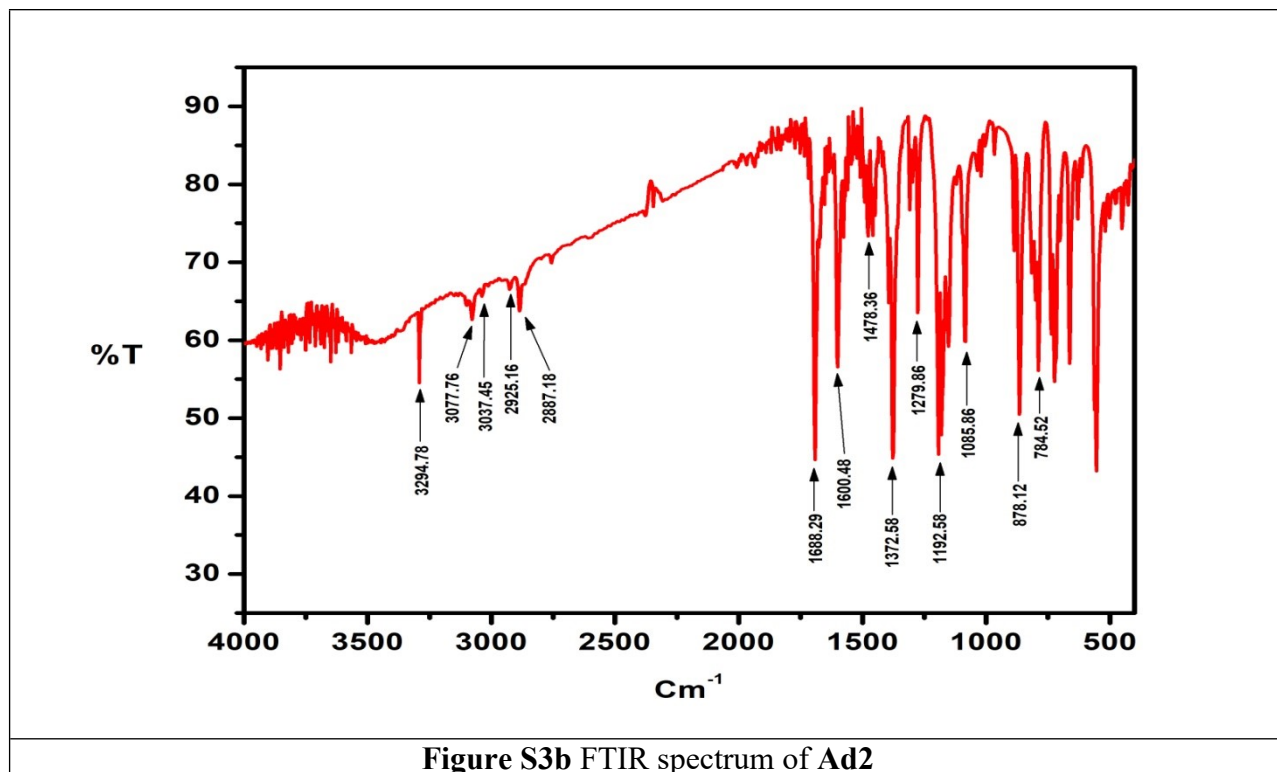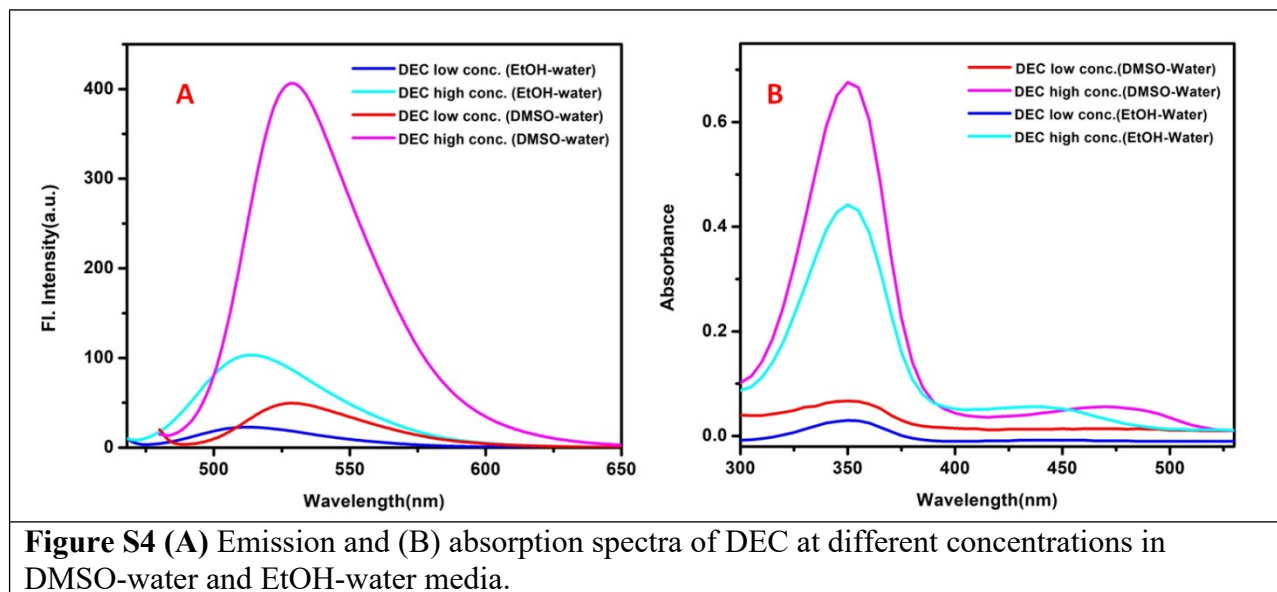

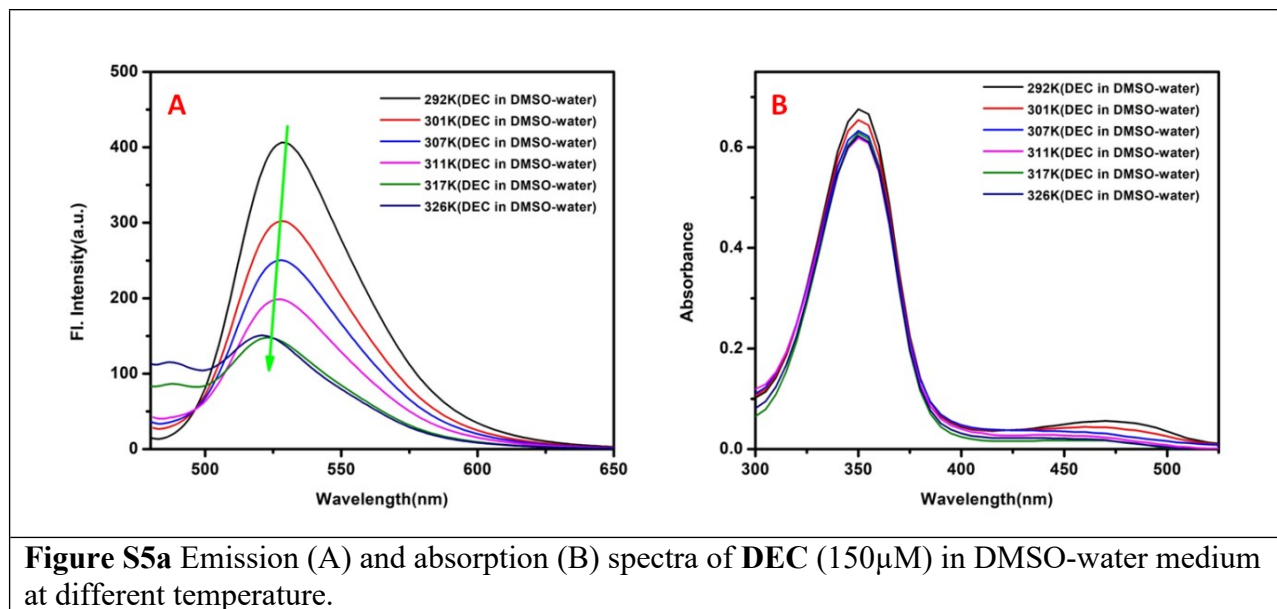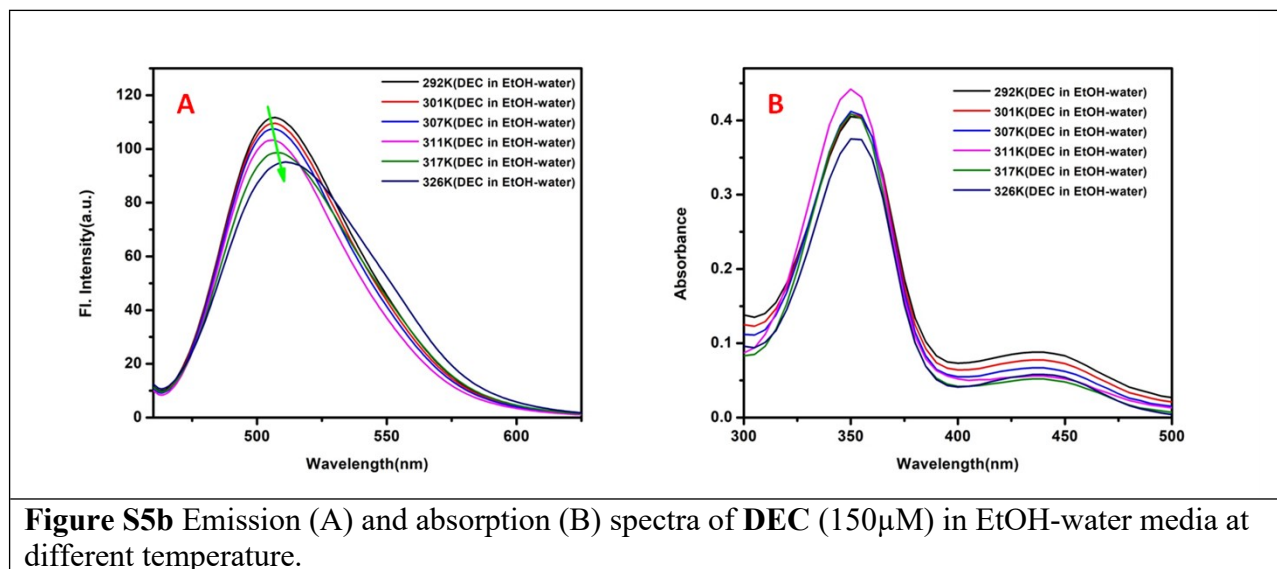

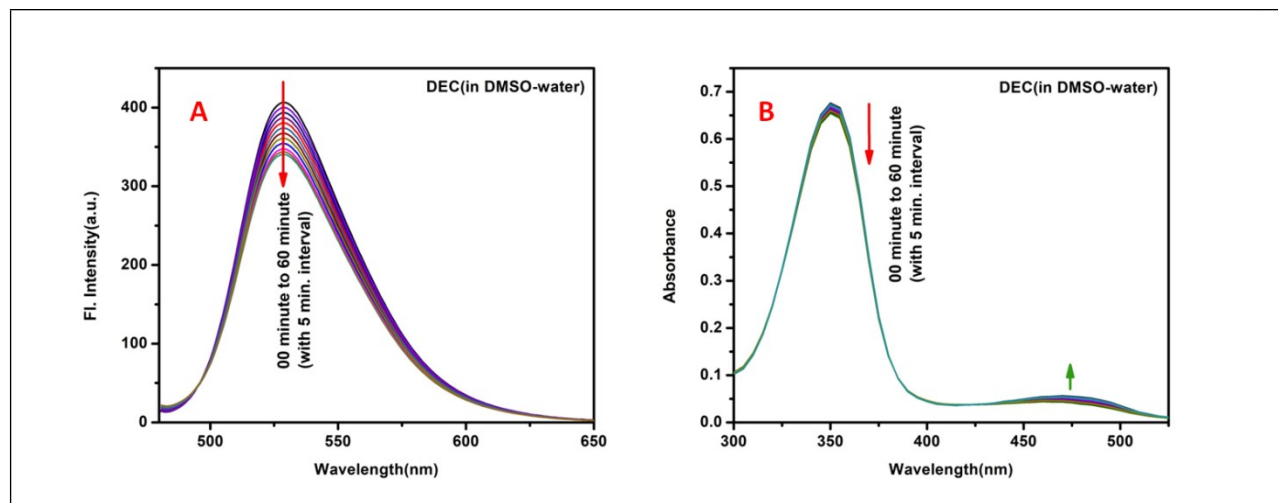

**Figure S5c** Variation of emission (A) and absorption (B) spectra of **DEC** (150 μM) in DMSO-water media upon exposure to sun light for different time span.

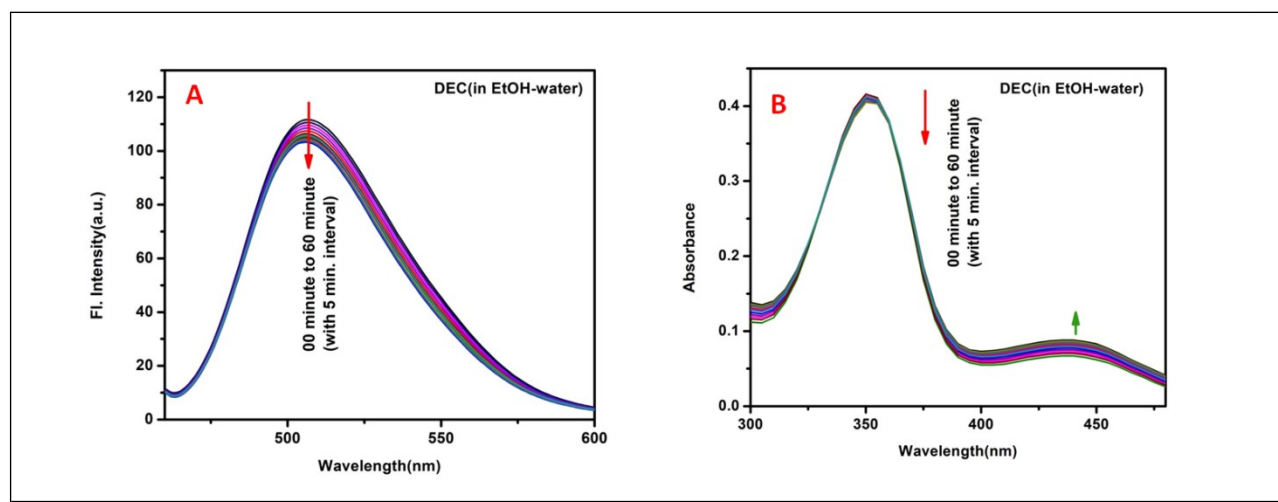

**Figure S5d** Variation of emission (A) and absorption (B) spectra of **DEC** (150 μM) in EtOH-water media upon exposure to sun light for different time.

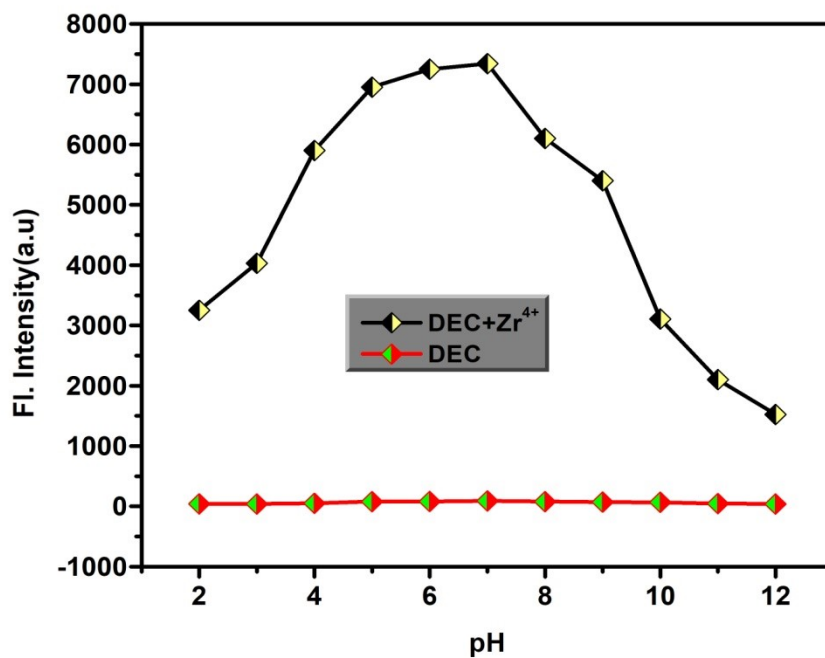

**Figure S6** Effect of pH on the emission intensities of DEC ( $\lambda_{\text{ex}} = 380 \text{ nm}$ ,  $\lambda_{\text{em}} = 508 \text{ nm}$ ) in presence and absence of **Zr(IV)**

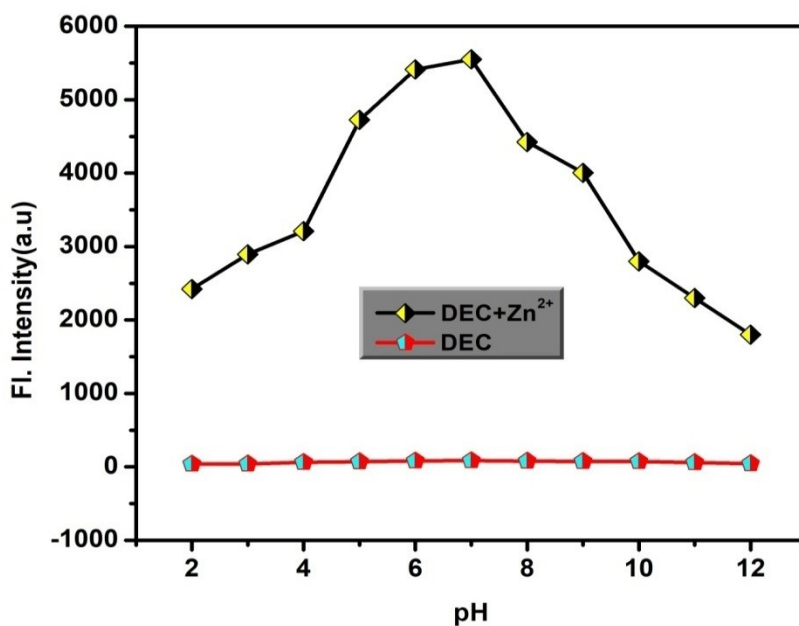

**Figure S7** Effect of pH on the emission intensities of DEC ( $\lambda_{\text{ex}} = 350 \text{ nm}$ ,  $\lambda_{\text{em}} = 474 \text{ nm}$ ) in presence and absence of **Zn(II)**



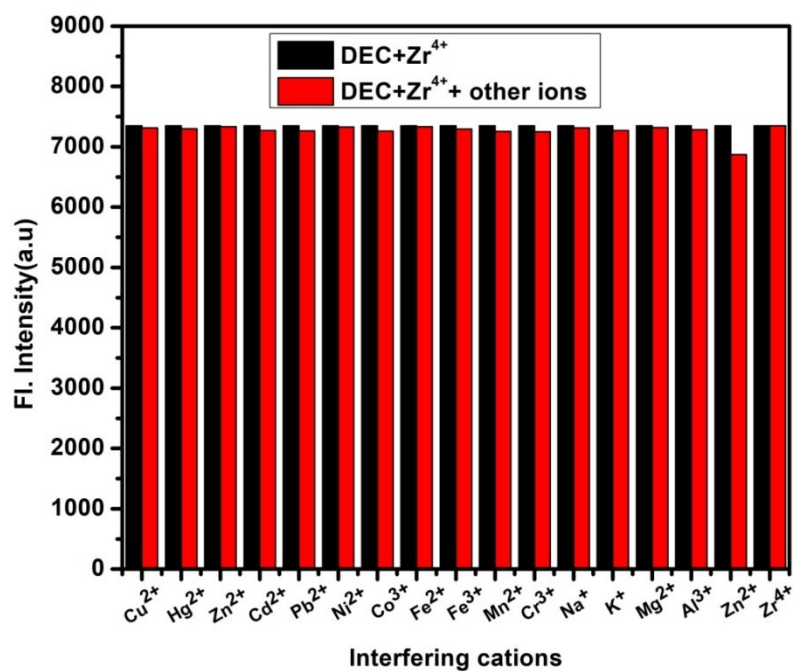

**Figure S8** Interference studies for fluorescence detection of **Zr(IV)** using **DEC** ( $\lambda_{\text{ex}} = 380 \text{ nm}$ ,  $\lambda_{\text{em}} = 508 \text{ nm}$ ).

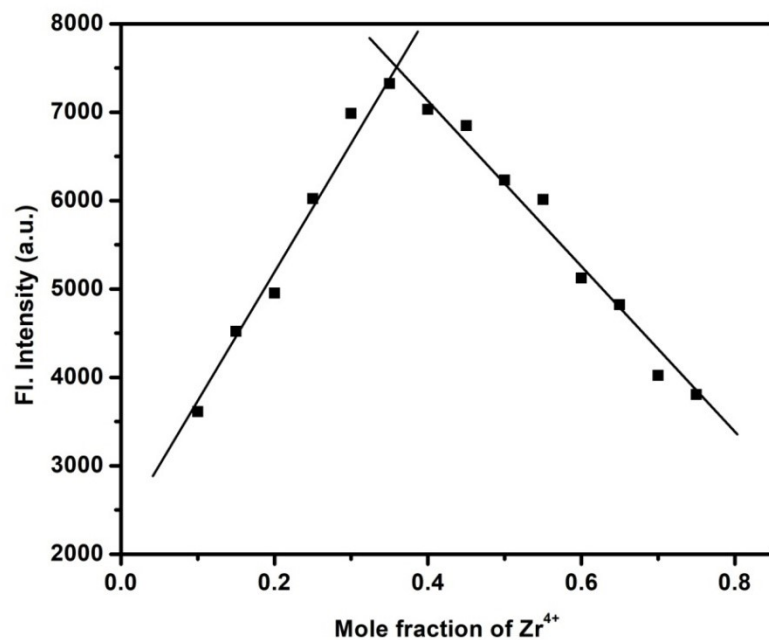

**Figure S9** Job's plot for stoichiometry determination of **[DEC-Zr(IV)]** adduct ( $\lambda_{\text{ex}} = 380 \text{ nm}$ ,  $\lambda_{\text{em}} = 508 \text{ nm}$ ).

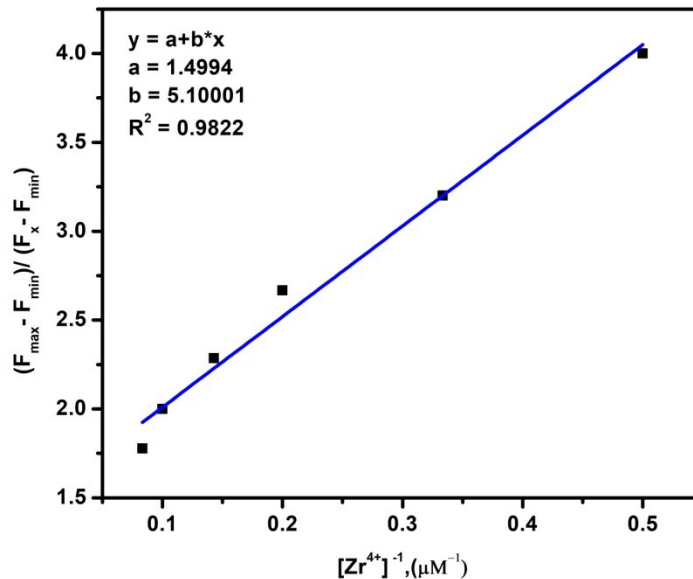

**Figure S10** Benesi-Hildebrand plot for determination of association constant of **DEC** for **Zr(IV)** (linear portion) ( $\lambda_{ex} = 380 \text{ nm}$ ,  $\lambda_{em} = 508 \text{ nm}$ )

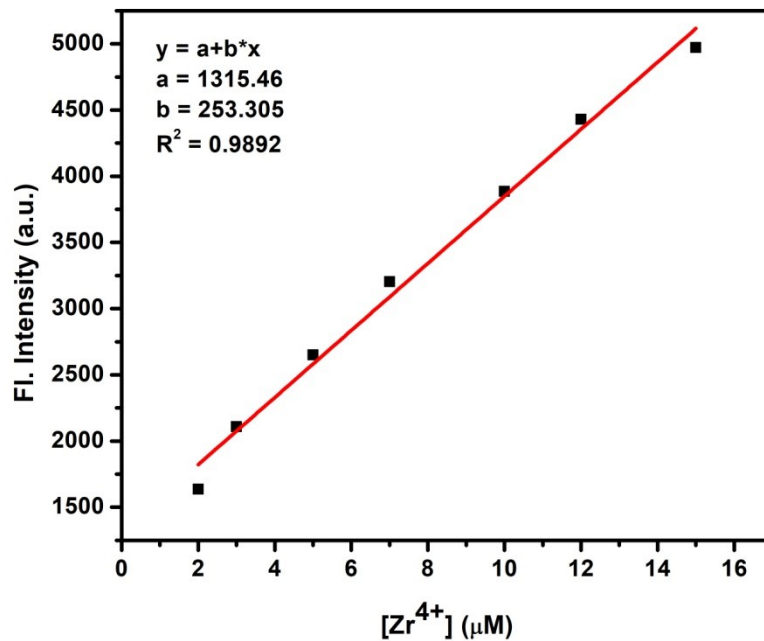

**Figure S11** Determination of the detection limit based on change in the ratio (emission intensity) ( $\lambda_{ex} = 380 \text{ nm}$ ,  $\lambda_{em} = 508 \text{ nm}$ ) of **DEC** ( $40 \mu M$ ) upon addition of **Zr(IV)**

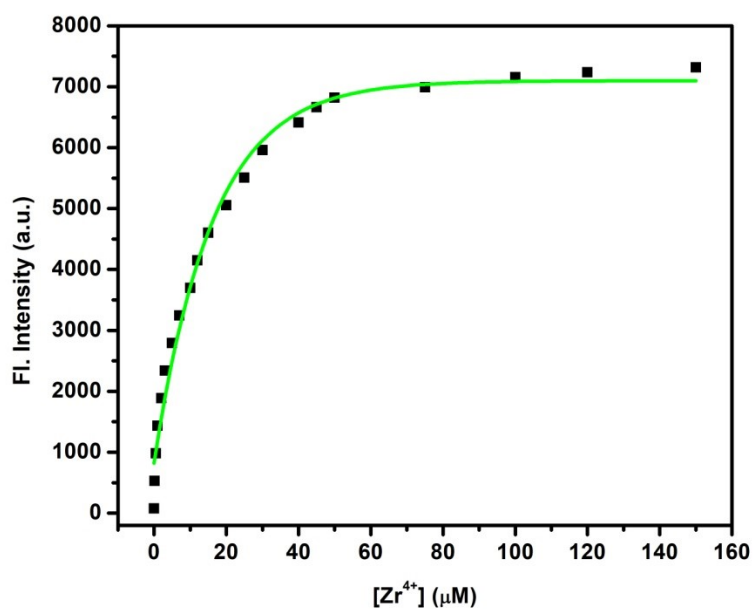

**Figure S12** Plot of emission intensities of DEC (40 μM,  $\lambda_{\text{ex}} = 380 \text{ nm}$ ,  $\lambda_{\text{em}} = 580 \text{ nm}$ ) as a function of externally added Zr(IV) (1.0-160 μM)

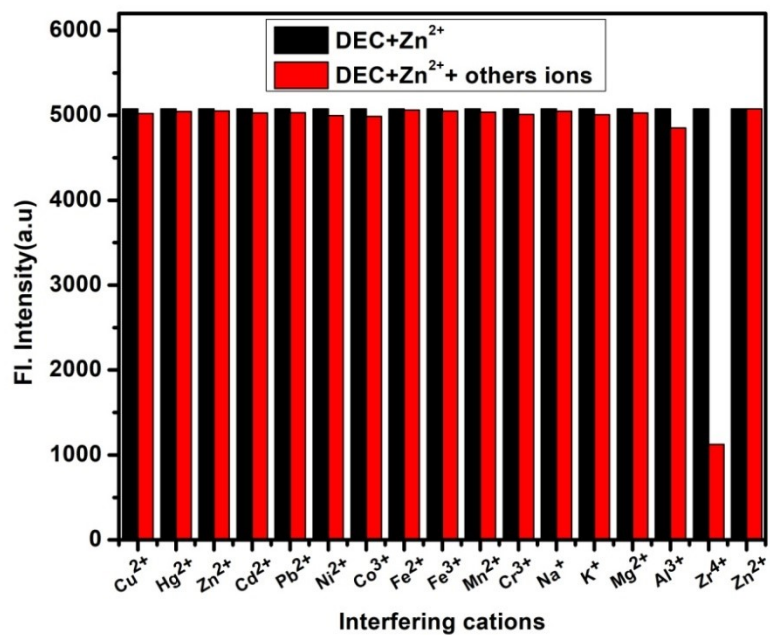

**Figure S13** Interference studies for fluorescence detection of Zn(II) using DEC ( $\lambda_{\text{ex}} = 350 \text{ nm}$ ,  $\lambda_{\text{em}} = 474 \text{ nm}$ ).

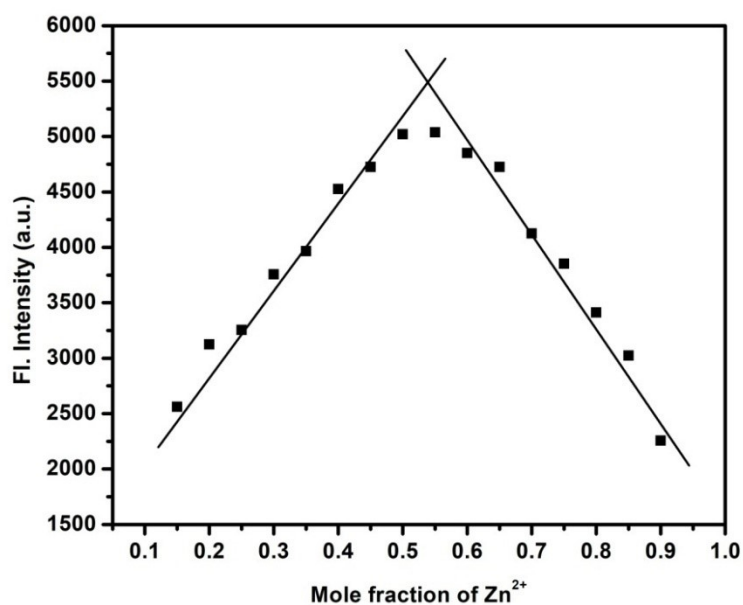

**Figure S14** Job's plot for stoichiometry determination of [DEC-Zn(II)] adduct ( $\lambda_{\text{ex}} = 350 \text{ nm}$ ,  $\lambda_{\text{em}} = 474 \text{ nm}$ ).

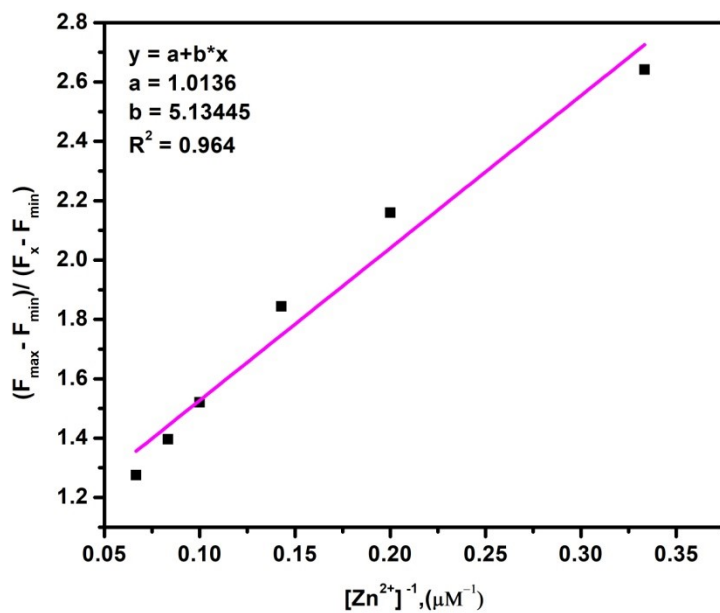

**Figure S15** Benesi-Hildebrand plot for determination of association constant of DEC for Zn(II) (liner portion) ( $\lambda_{\text{ex}} = 350 \text{ nm}$ ,  $\lambda_{\text{em}} = 474 \text{ nm}$ )

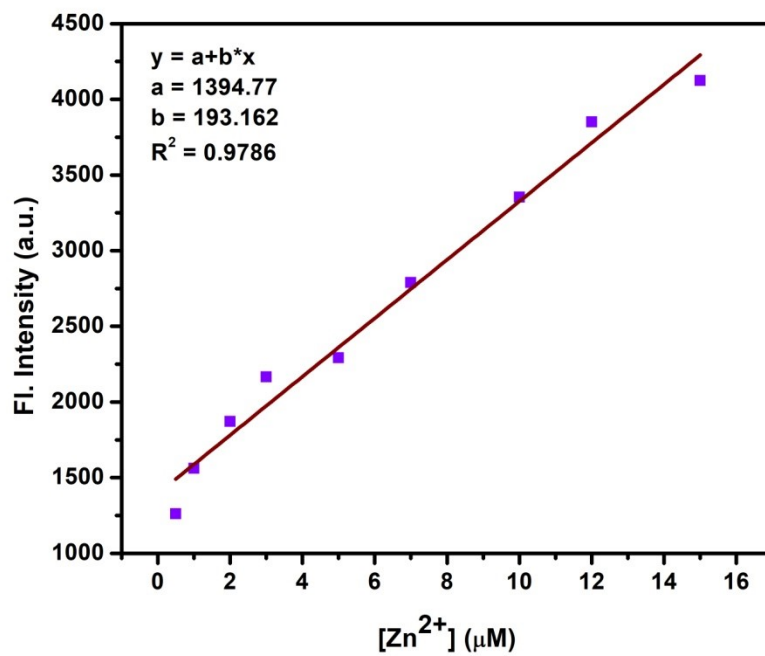

**Figure S16** Determination of detection limit based on change in the ratio (emission intensity) ( $\lambda_{\text{ex}} = 350 \text{ nm}$ ,  $\lambda_{\text{em}} = 474 \text{ nm}$ ) of **DEC** ( $40 \mu\text{M}$ ) upon addition of **Zn(II)**

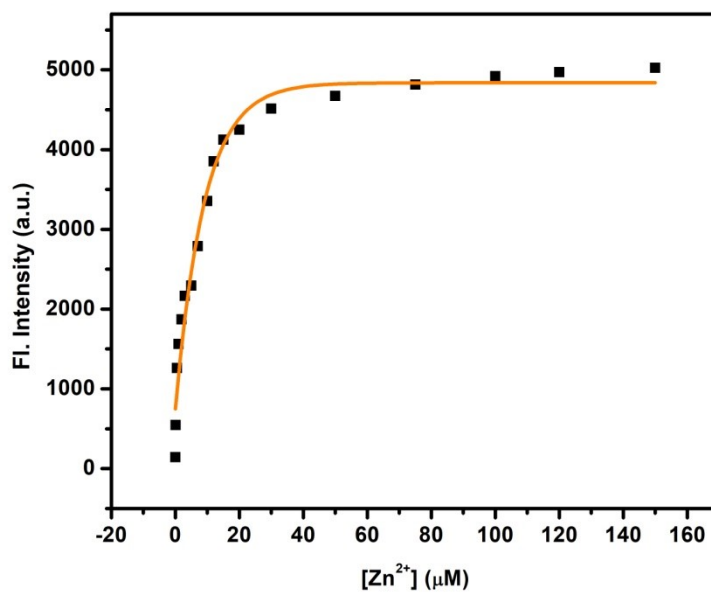

**Figure S17** Plot of emission intensities of **DEC** ( $40 \mu\text{M}$ ,  $\lambda_{\text{ex}} = 350 \text{ nm}$ ,  $\lambda_{\text{em}} = 474 \text{ nm}$ ) as a function of externally added **Zn(II)** ( $1.0\text{-}160 \mu\text{M}$ )

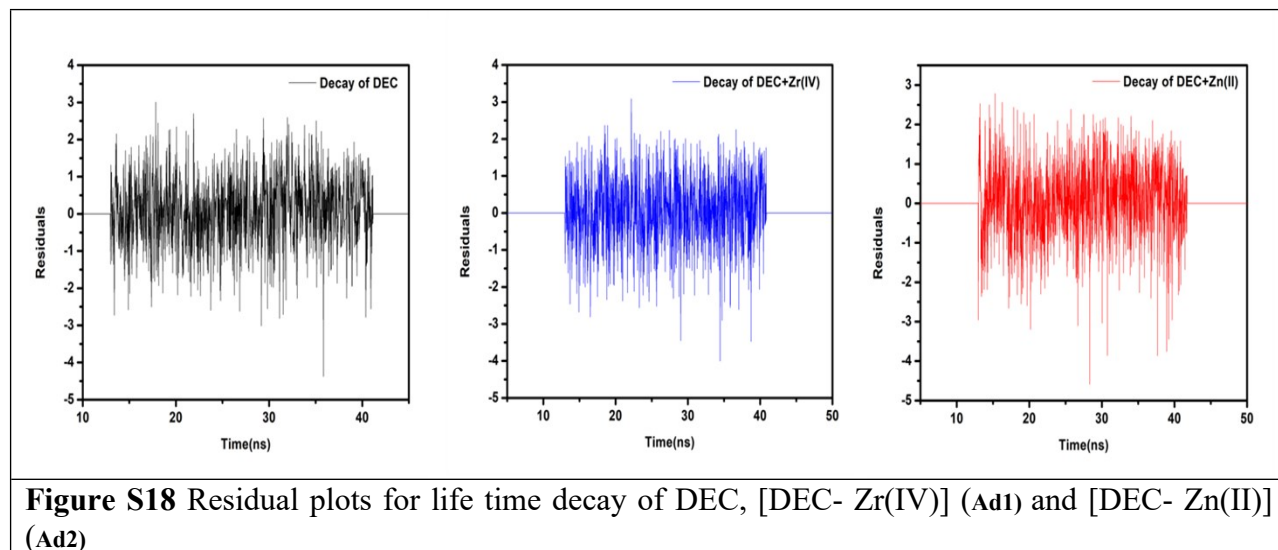

Supplement: d3nj01738a1.pdf [file d3nj01738a1.pdf]
